# Supplementary material
Source: publisher figshare collection journal article supplement (https://acs.figshare.com/ndownloader/files/28986469)
Supplement: Supplementary file 1 [file 28986469]

# Supporting Information

## Investigating hierarchical gas confinement in high-rank coal through small-angle neutron scattering

Rui Zhang and Shimin Liu\*

Department of Energy and Mineral Engineering, G<sup>3</sup> Center and Energy Institute, Pennsylvania State University, University Park, PA 16802, USA

Corresponding author:

\*Tel. No.: +1 8148634491; Fax No.: +1 8148653248; Email: [szl3@psu.edu](mailto:szl3@psu.edu)

### Figures

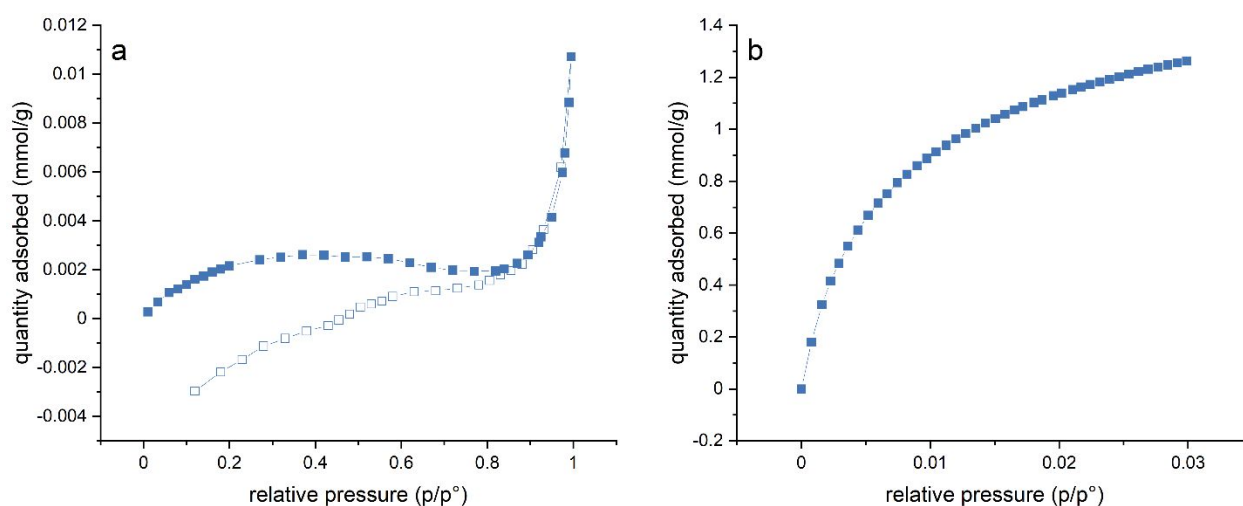

**Fig. S1** Low-pressure adsorption isotherms of the Hazleton coal: (a) N<sub>2</sub> sorption and (b) CO<sub>2</sub> sorption.

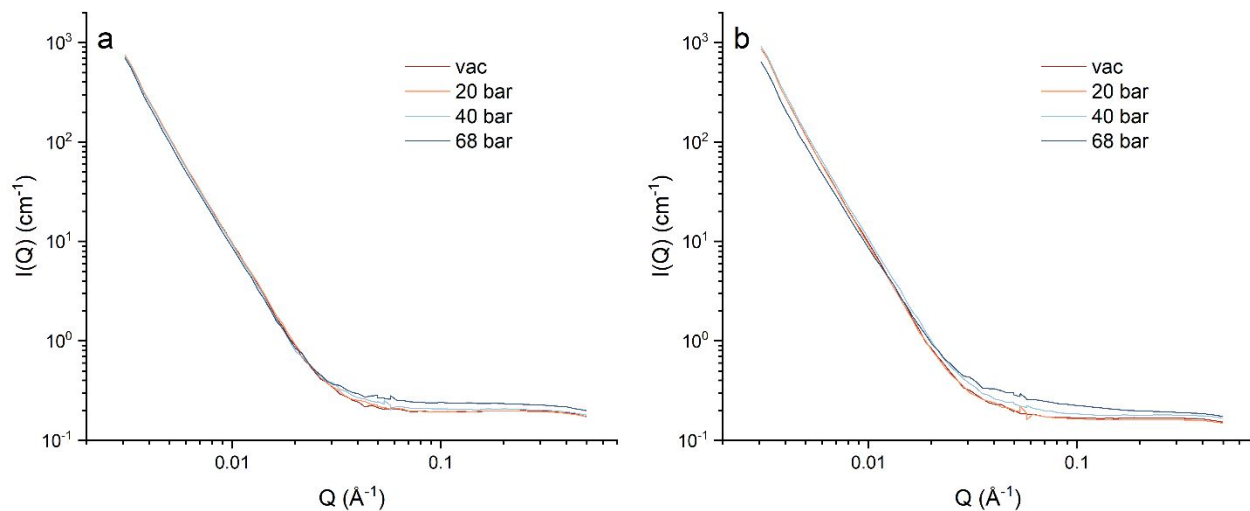

**Fig. S2** Scattering intensities under (a)  $\text{CD}_4$  and (b)  $\text{CO}_2$  injection for the Hazleton coal powder sample.

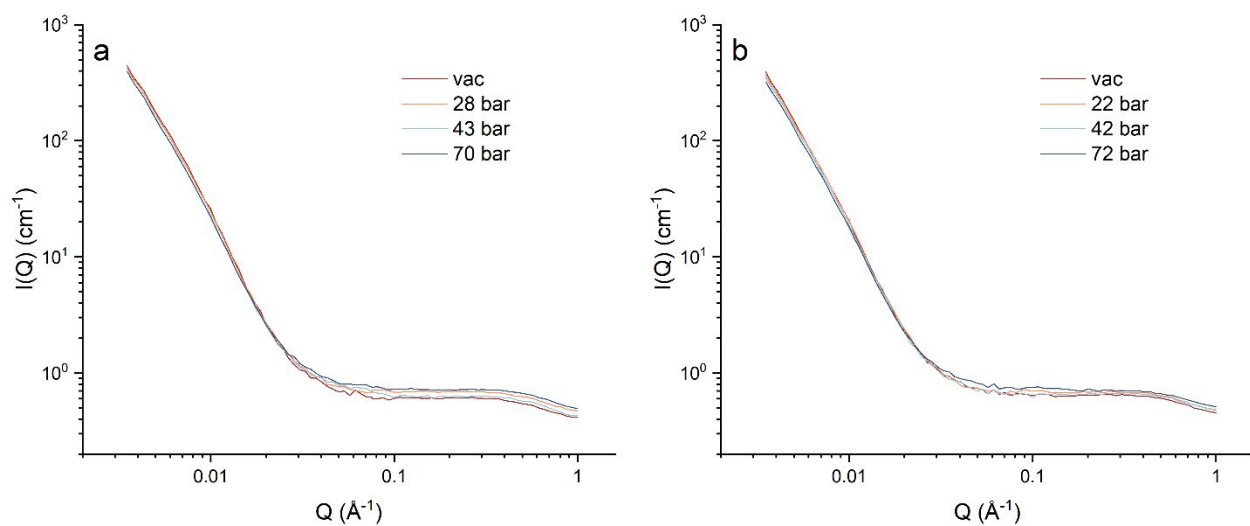

**Fig. S3** Scattering intensities under (a)  $\text{CD}_4$  and (b)  $\text{CO}_2$  injection for the Hazleton coal thin section cut parallel to the bedding.

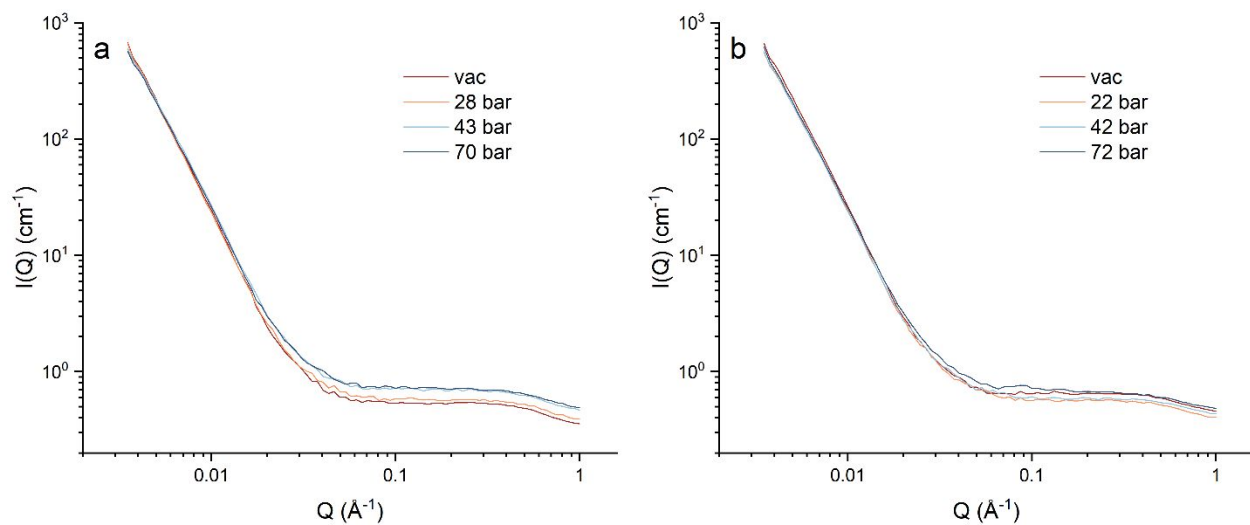

**Fig. S4** Scattering intensities under (a)  $\text{CD}_4$  and (b)  $\text{CO}_2$  injection for the Hazleton coal thin section cut perpendicular to the bedding.

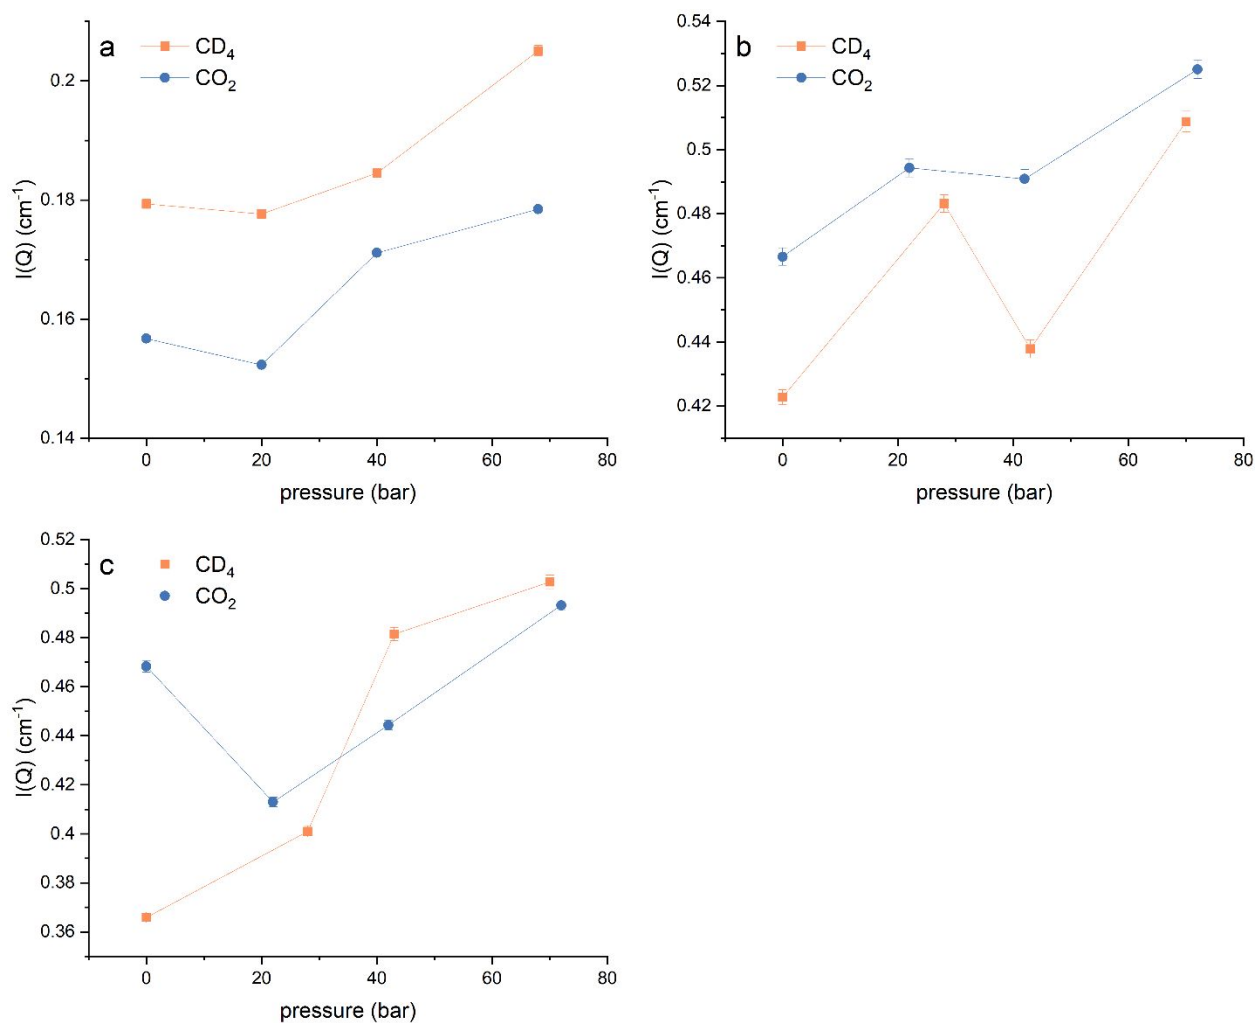

**Fig. S5** Scattering backgrounds based on the slope of  $I(Q)Q^4$  versus  $Q^4$  assuming Porod law at high  $Q$  for the (a) Hazleton coal powder sample and thin section samples cut (b) parallel and (c) perpendicular to the bedding.

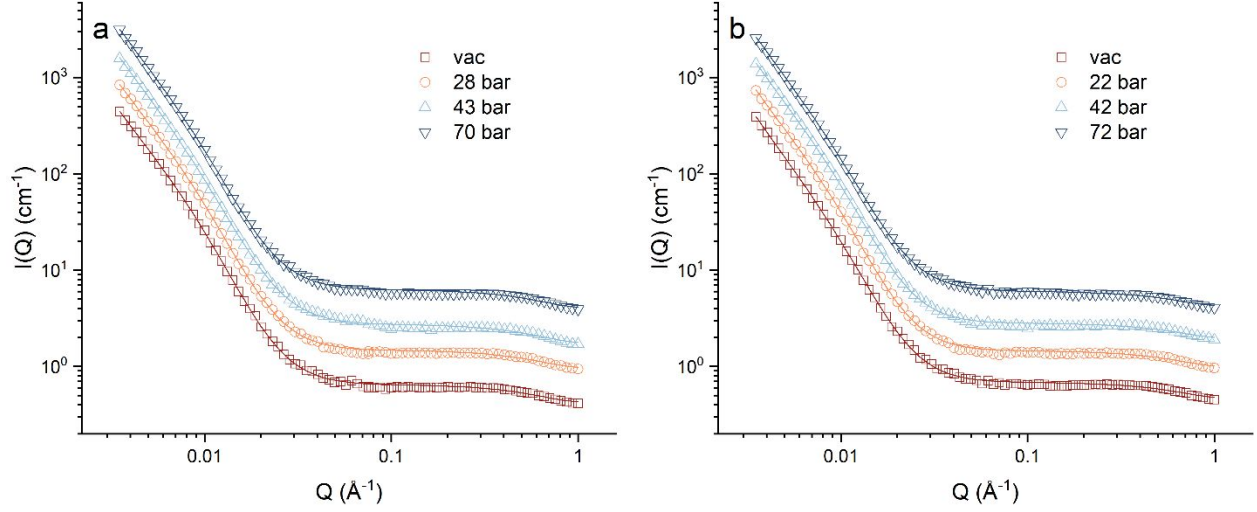

**Fig. S6** Scattering intensities under (a)  $\text{CD}_4$  and (b)  $\text{CO}_2$  injection for the Hazleton coal thin section cut parallel to the bedding (Hollow dots are experimental data and solid lines are data-fitted results. Scattering intensities under gas injection are offset for a clear view).

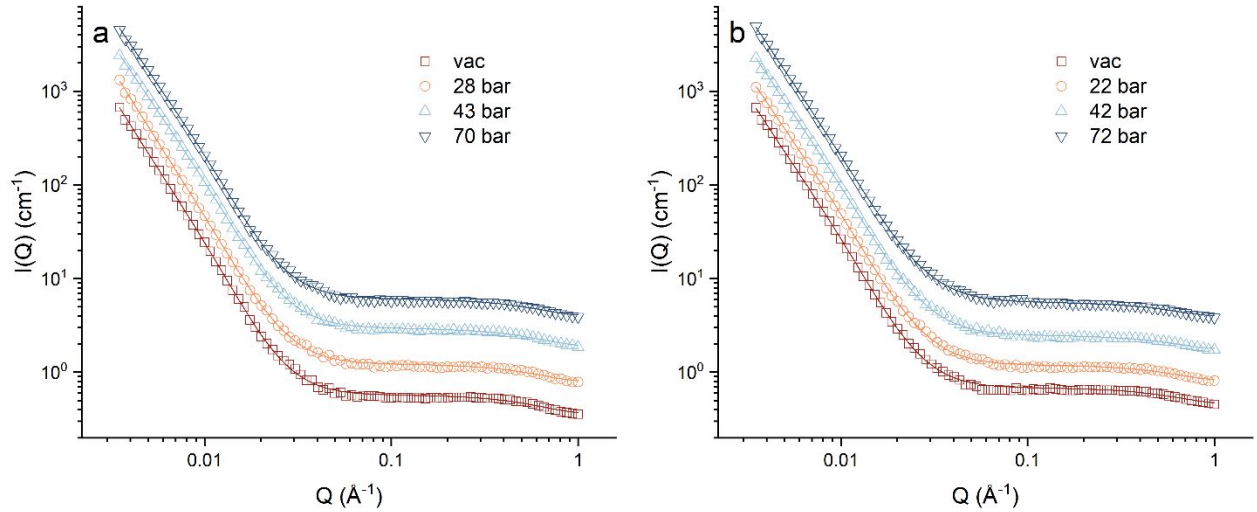

**Fig. S7** Scattering intensities under (a)  $\text{CD}_4$  and (b)  $\text{CO}_2$  injection for the Hazleton coal thin section cut perpendicular to the bedding (Hollow dots are experimental data and solid lines are data-fitted results. Scattering intensities under gas injection are offset for a clear view).

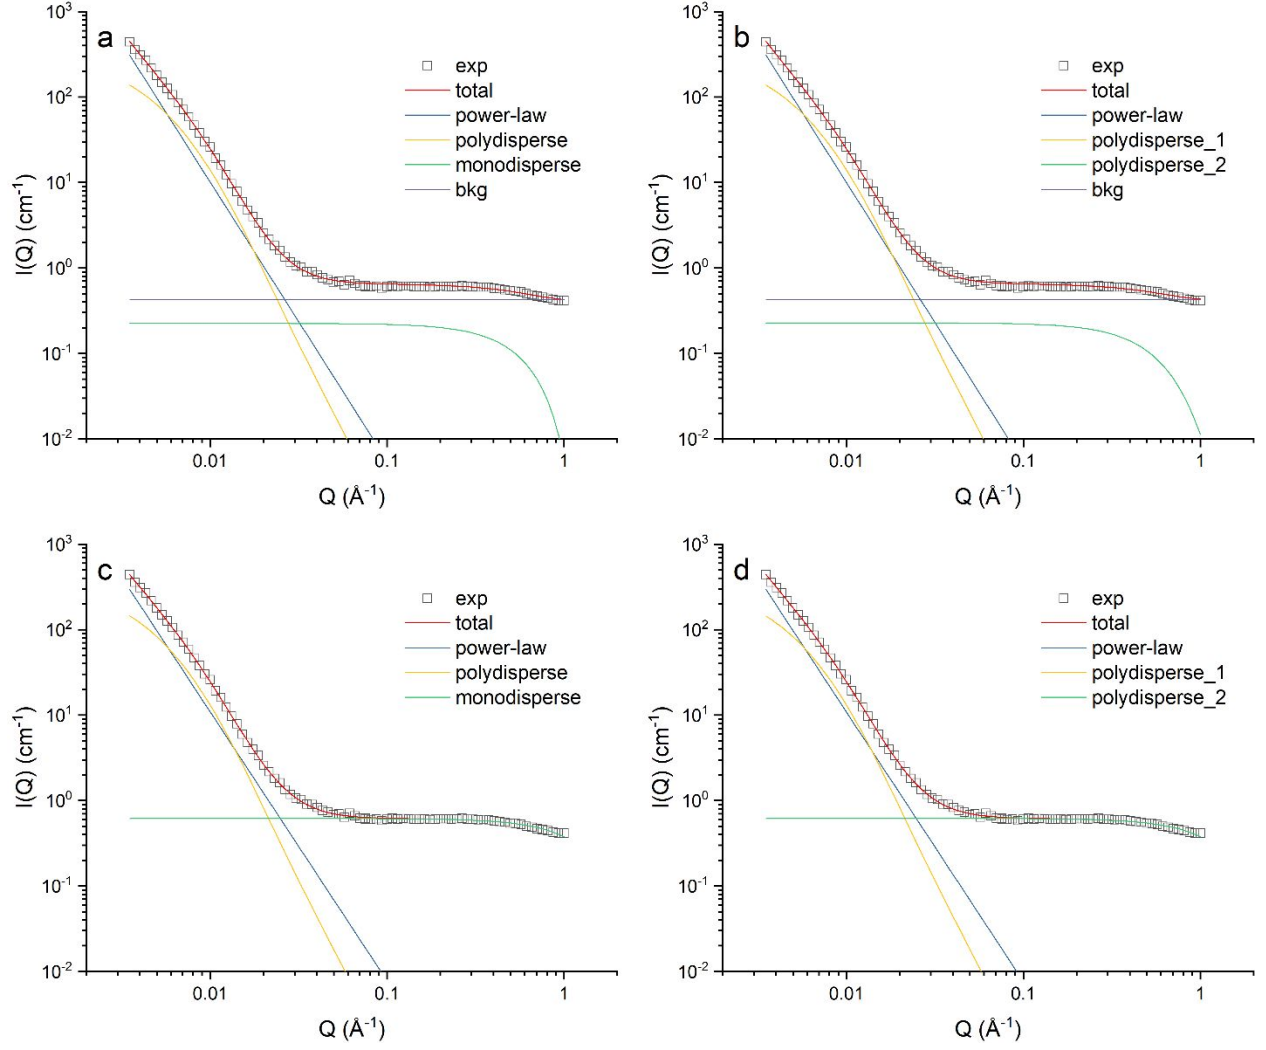

**Fig. S8** Different data-fitting strategies on the scattering intensity under vacuum for the Hazleton coal thin section cut parallel to the bedding (Hollow dots are experimental data and solid lines are data-fitted results).

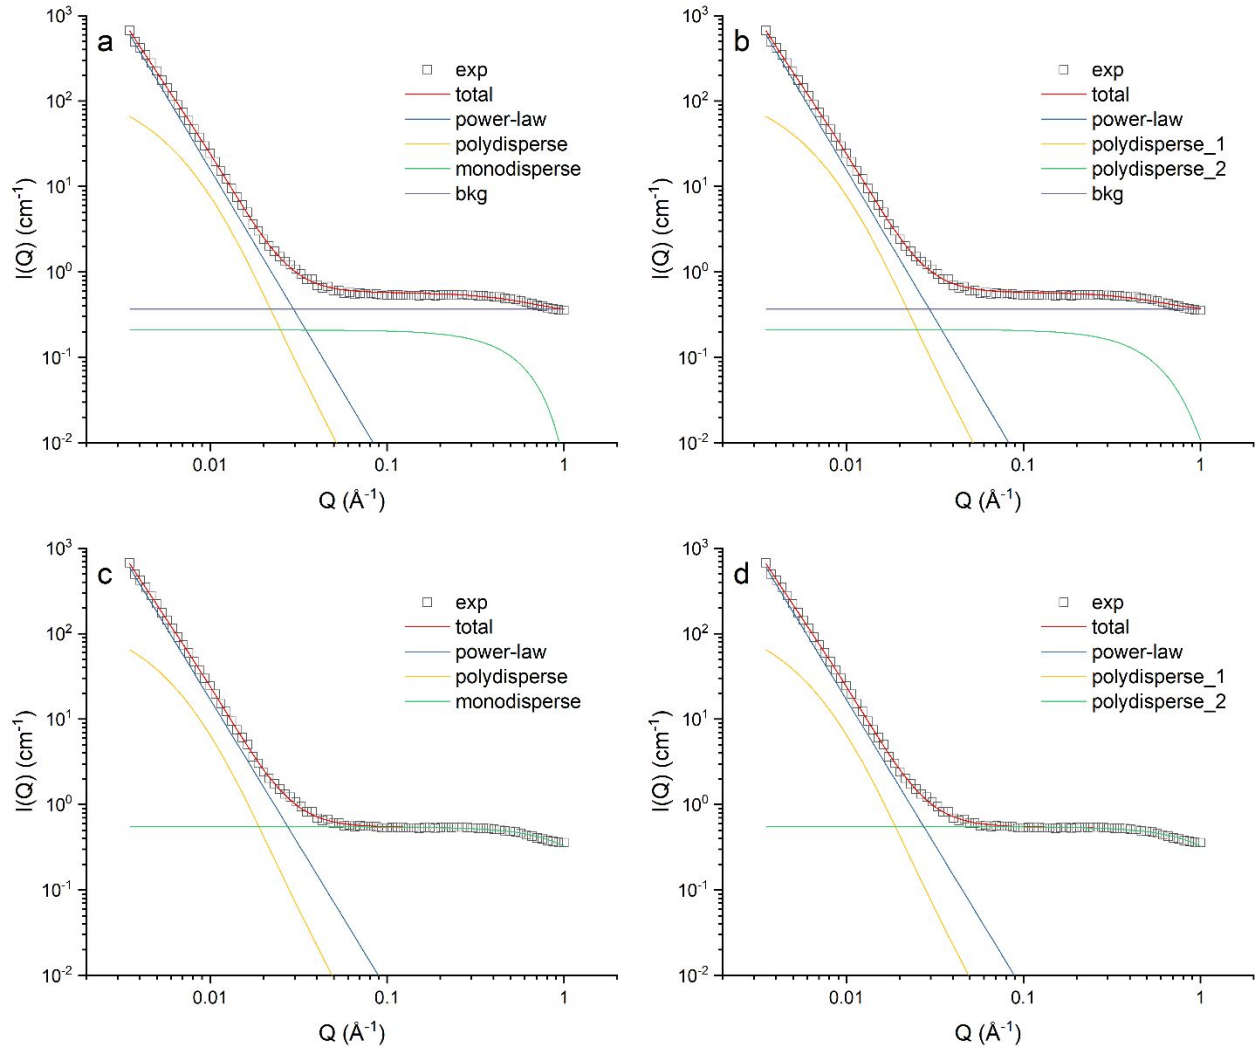

**Fig. S9** Different data-fitting strategies on the scattering intensity under vacuum for the Hazleton coal thin section cut perpendicular to the bedding (Hollow dots are experimental data, and solid lines are data-fitted results).

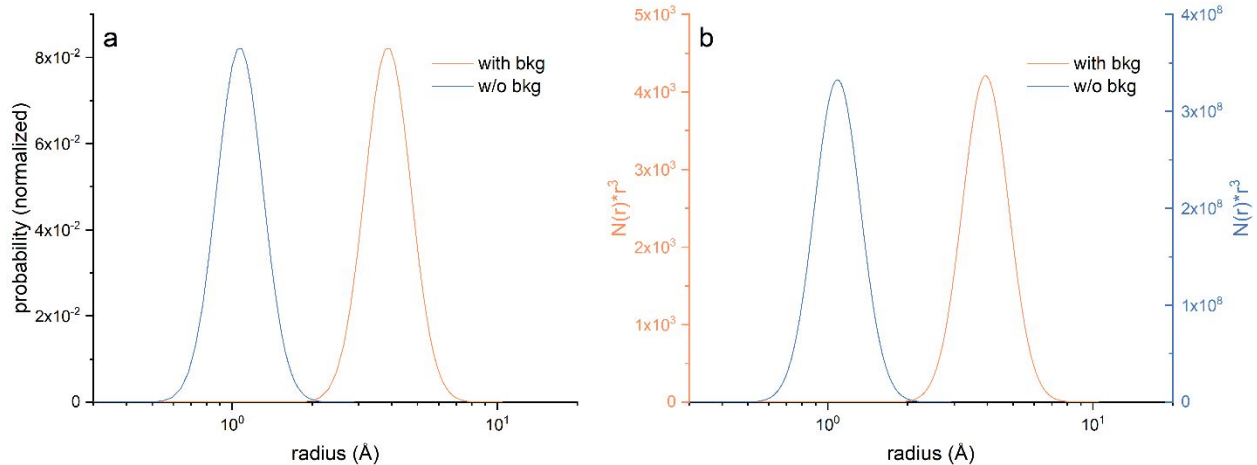

**Fig. S10** Probability density functions of micropores based on the fitting of the scattering intensity under vacuum with and without considering scattering background for the Hazleton coal powder sample: (a) sasview package; (b) sasfit package.

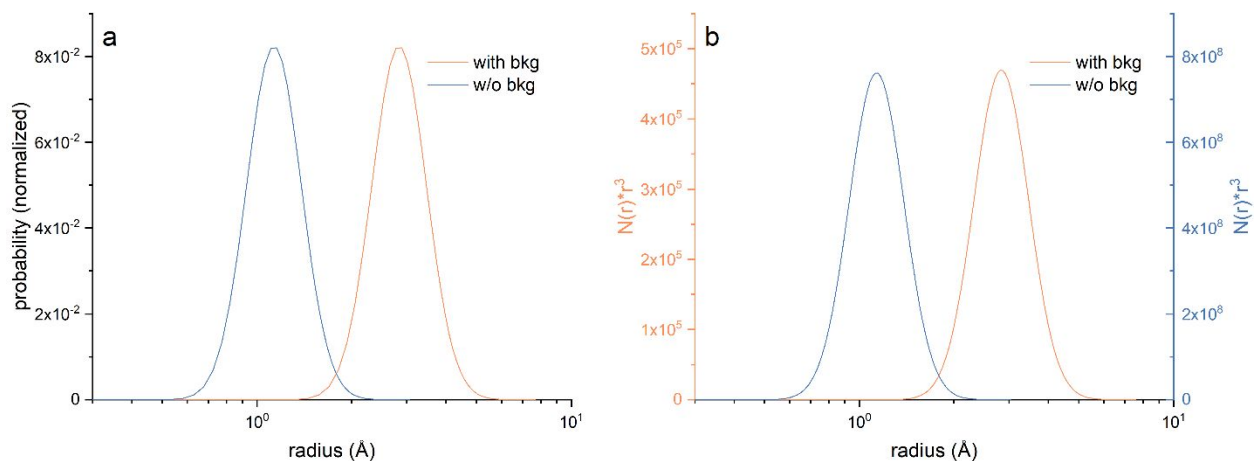

**Fig. S11** Probability density functions of micropores based on the fitting of the scattering intensity under vacuum with and without considering scattering background for the Hazleton coal thin section cut parallel to the bedding: (a) sasview package; (b) sasfit package.

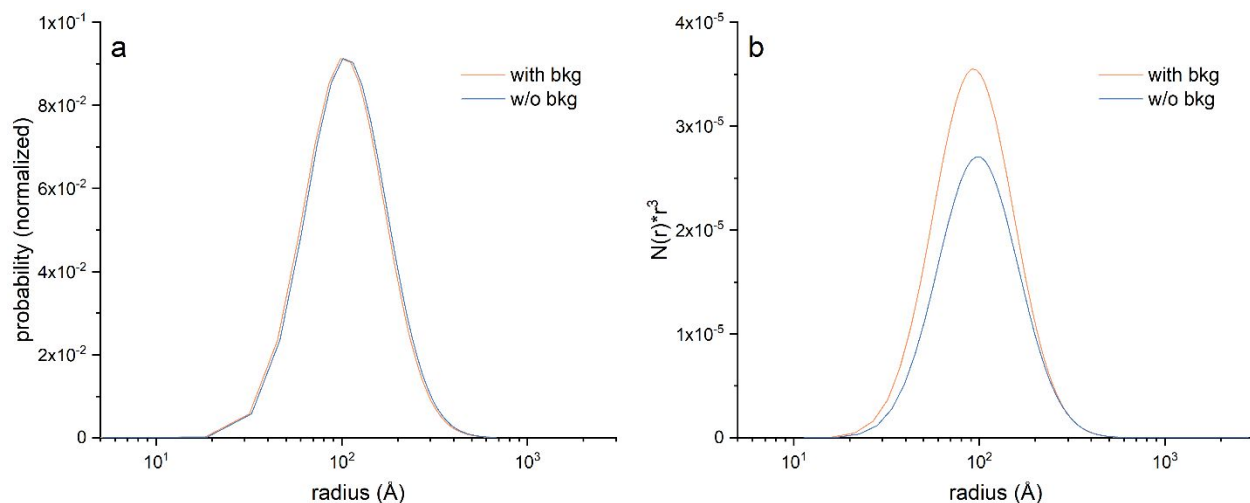

**Fig. S12** Probability density functions of mesopores based on the fitting of the scattering intensity under vacuum with and without considering scattering background for the Hazleton coal thin section cut parallel to the bedding: (a) sasview package; (b) sasfit package.

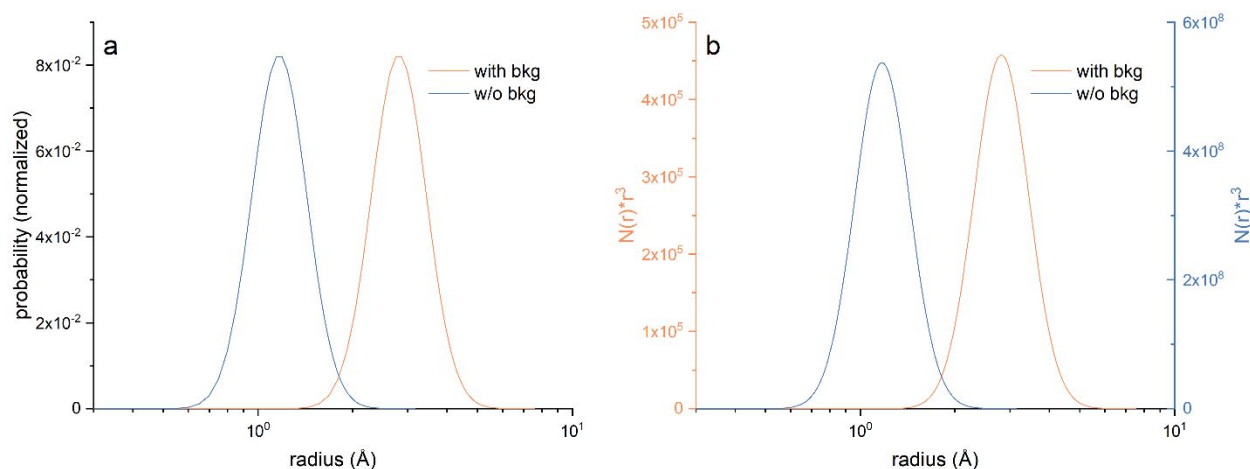

**Fig. S13** Probability density functions of micropores based on the fitting of the scattering intensity under vacuum with and without considering scattering background for the Hazleton coal thin section cut perpendicular to the bedding: (a) sasview package; (b) sasfit package.



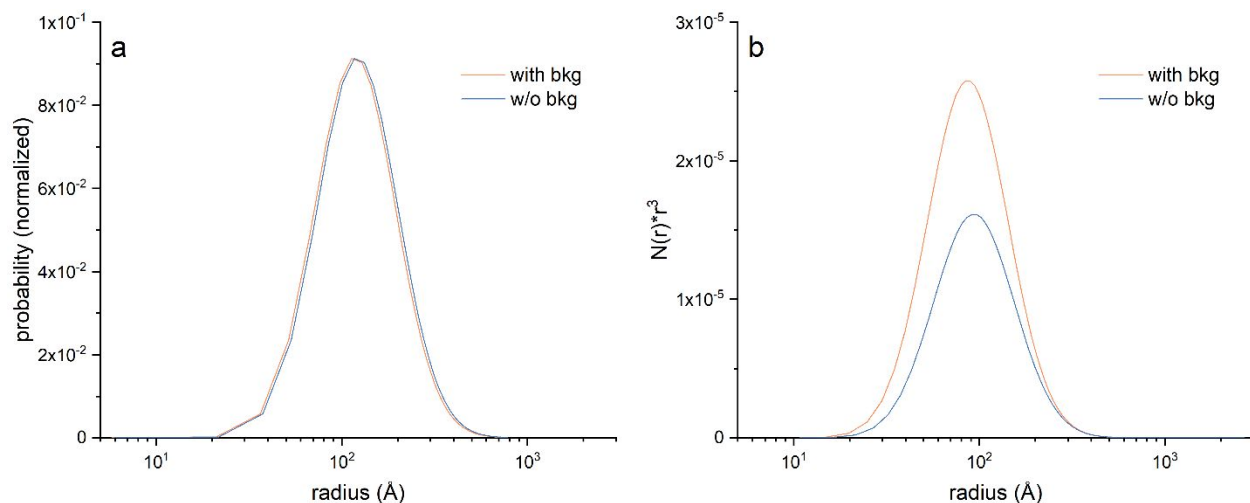

**Fig. S14** Probability density functions of mesopores based on the fitting of the scattering intensity under vacuum with and without considering scattering background for the Hazleton coal thin section cut perpendicular to the bedding: (a) sasview package; (b) sasfit package.

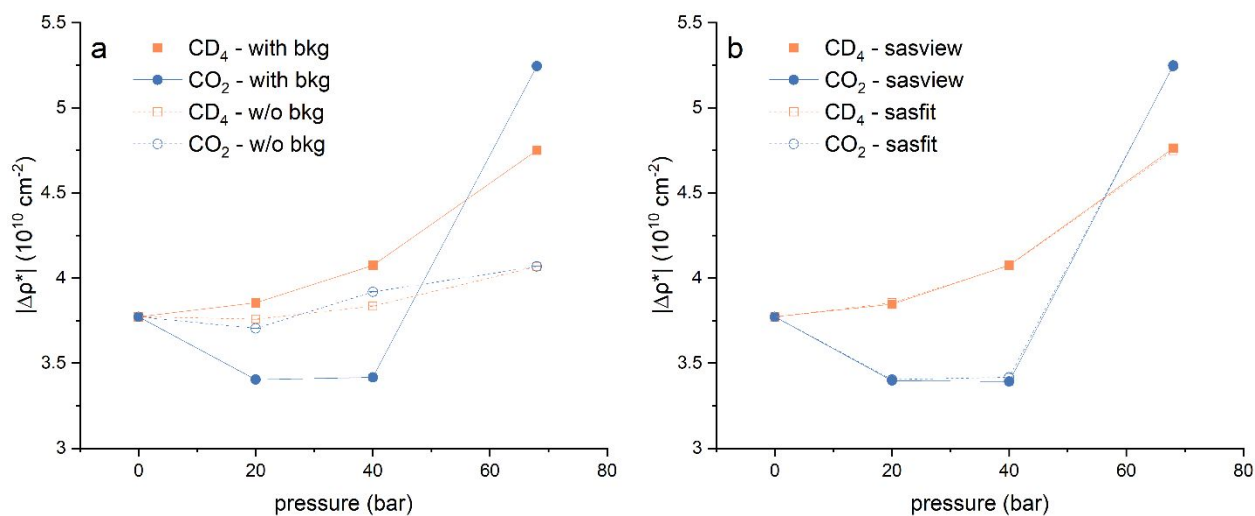

**Fig. S15** Scattering contrast as a function of pressure in micropores for the Hazleton coal powder sample.

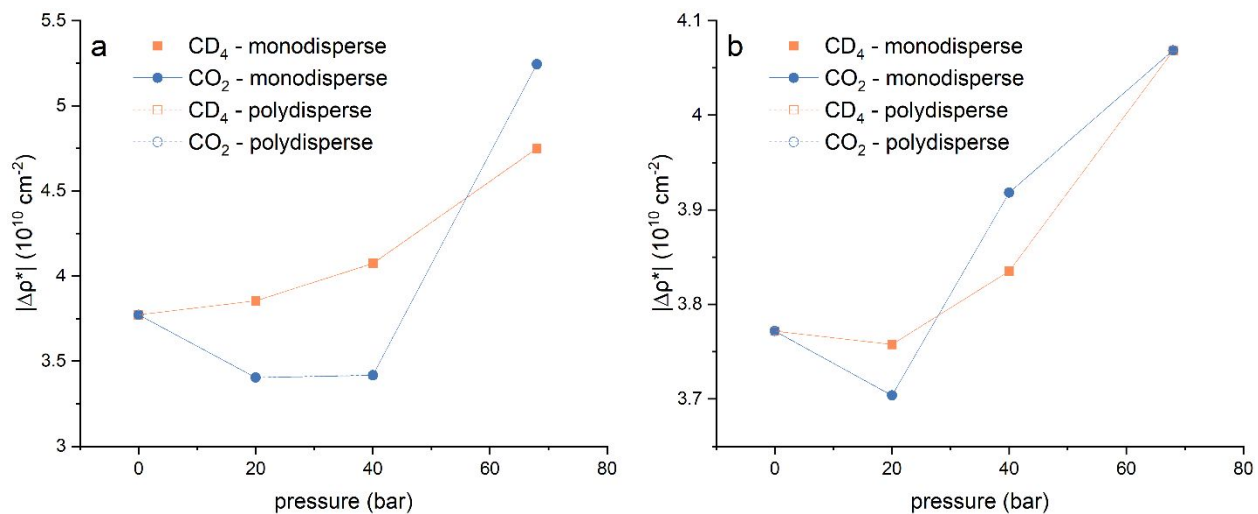

**Fig. S16** Scattering contrast as a function of pressure in micropores for the Hazleton coal powder sample.

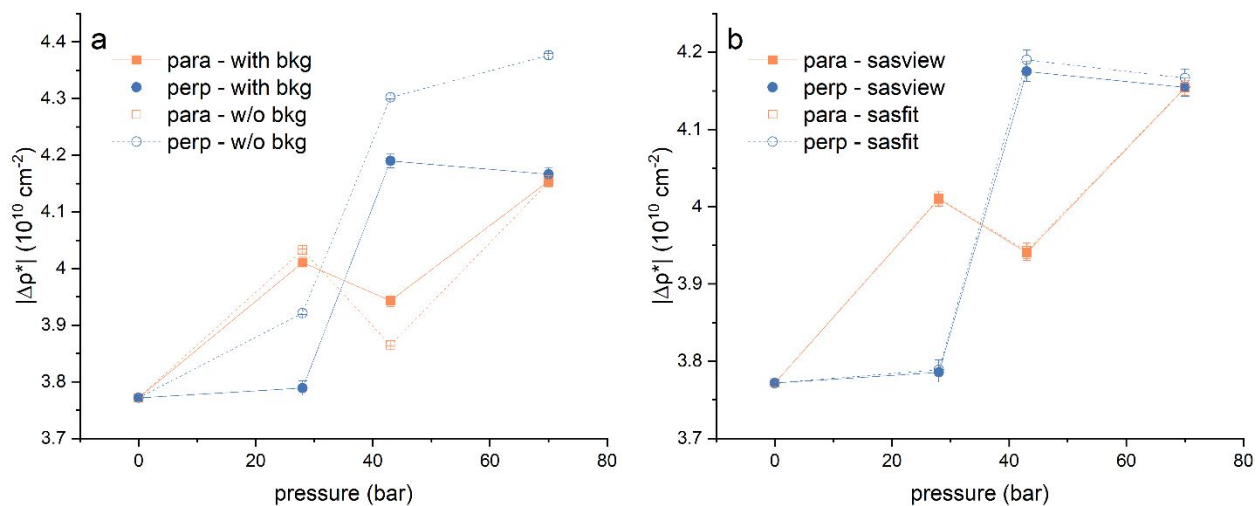

**Fig. S17** Scattering contrast as a function of pressure in micropores during CD<sub>4</sub> injection for the Hazleton coal thin section samples.

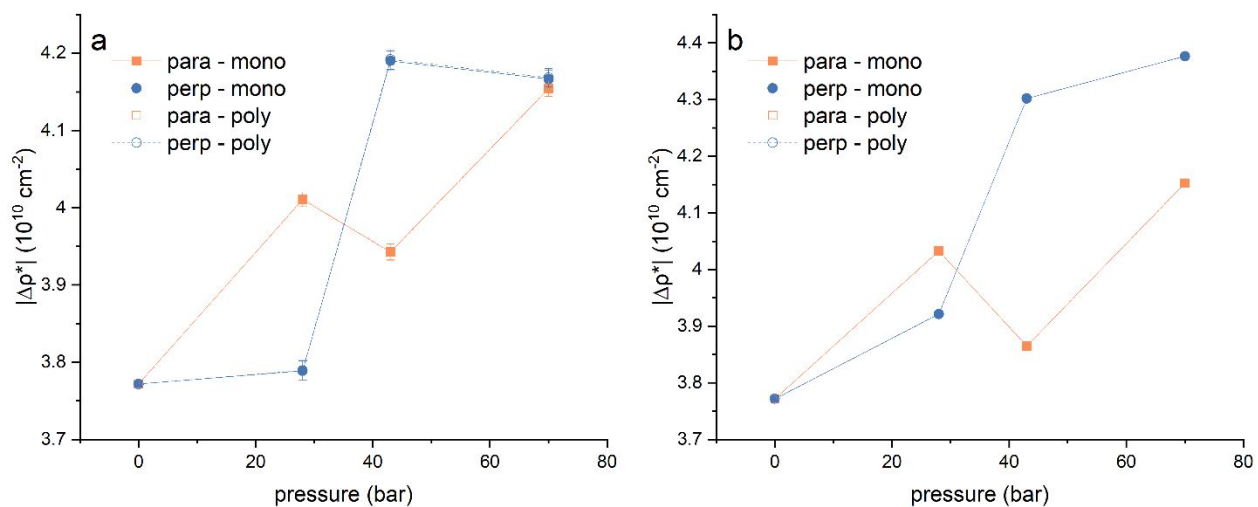

**Fig. S18** Scattering contrast as a function of pressure in micropores during CD<sub>4</sub> injection for the Hazleton coal thin section samples: (a) consider background; (b) without consider background.

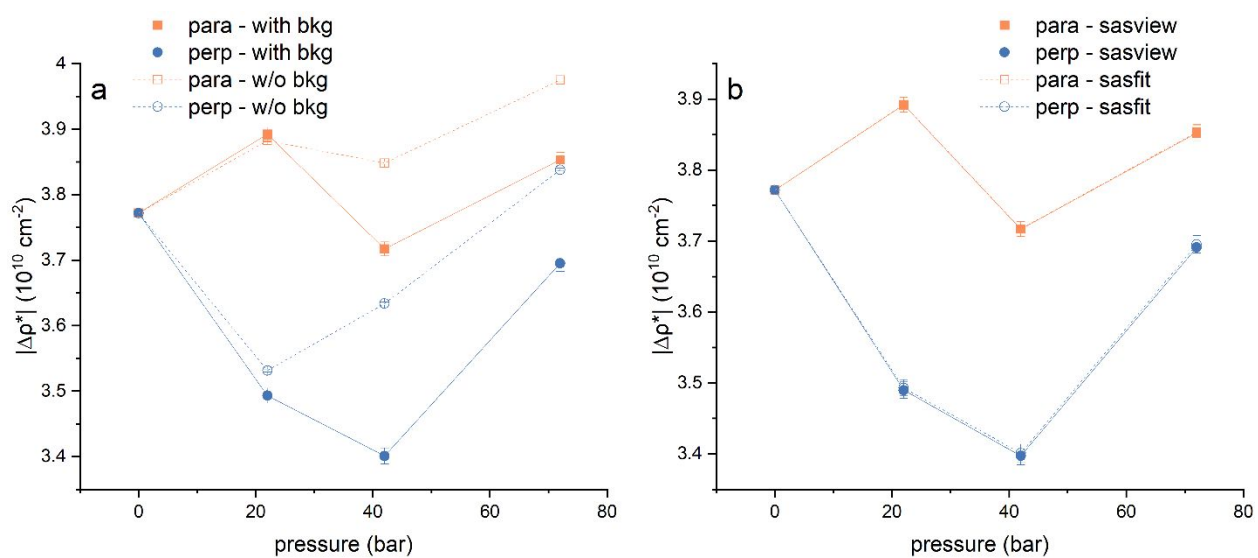

**Fig. S19** Scattering contrast as a function of pressure in micropores during CO<sub>2</sub> injection for the Hazleton coal thin section samples.

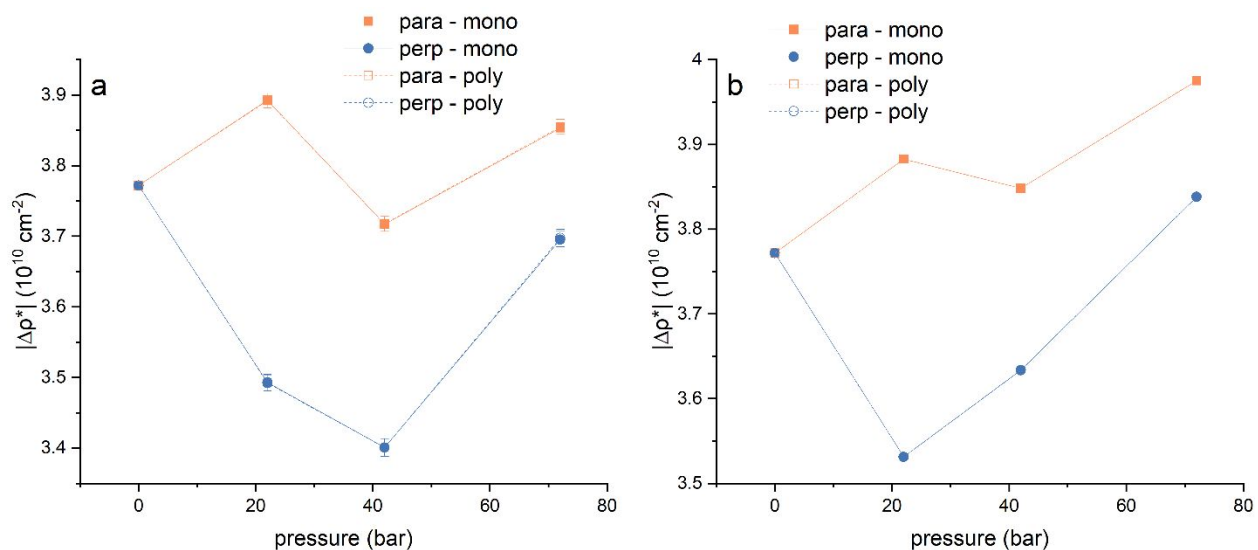

**Fig. S20** Scattering contrast as a function of pressure in micropores during  $\text{CO}_2$  injection for the Hazleton coal thin section samples: (a) consider background; (b) without consider background.

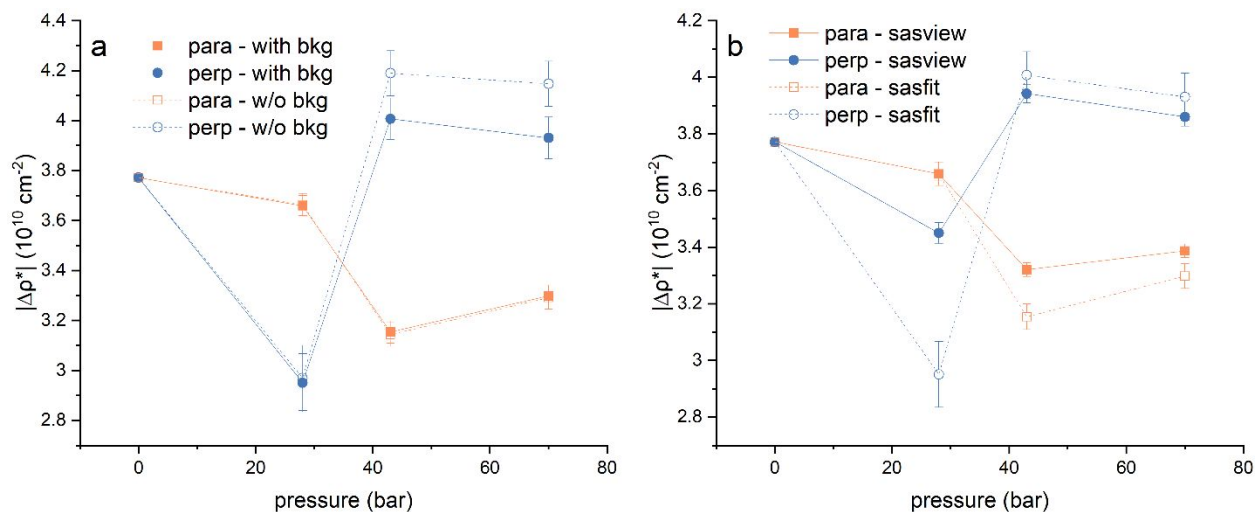

**Fig. S21** Scattering contrast as a function of pressure in mesopores during  $\text{CD}_4$  injection for the Hazleton coal thin section samples.

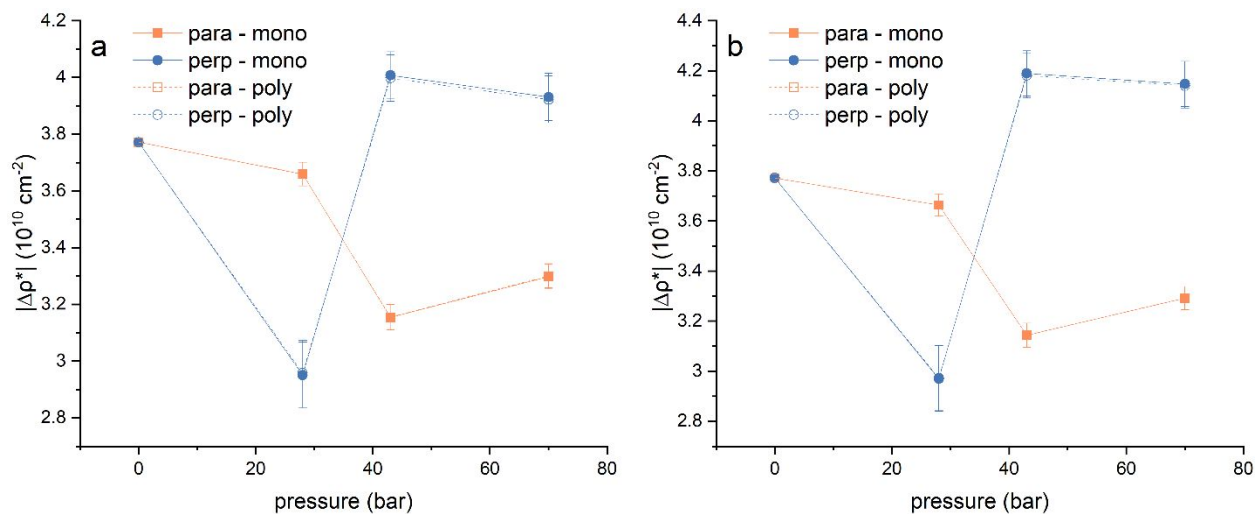

**Fig. S22** Scattering contrast as a function of pressure in mesopores during  $\text{CD}_4$  injection for the Hazleton coal thin section samples: (a) consider background; (b) without consider background.

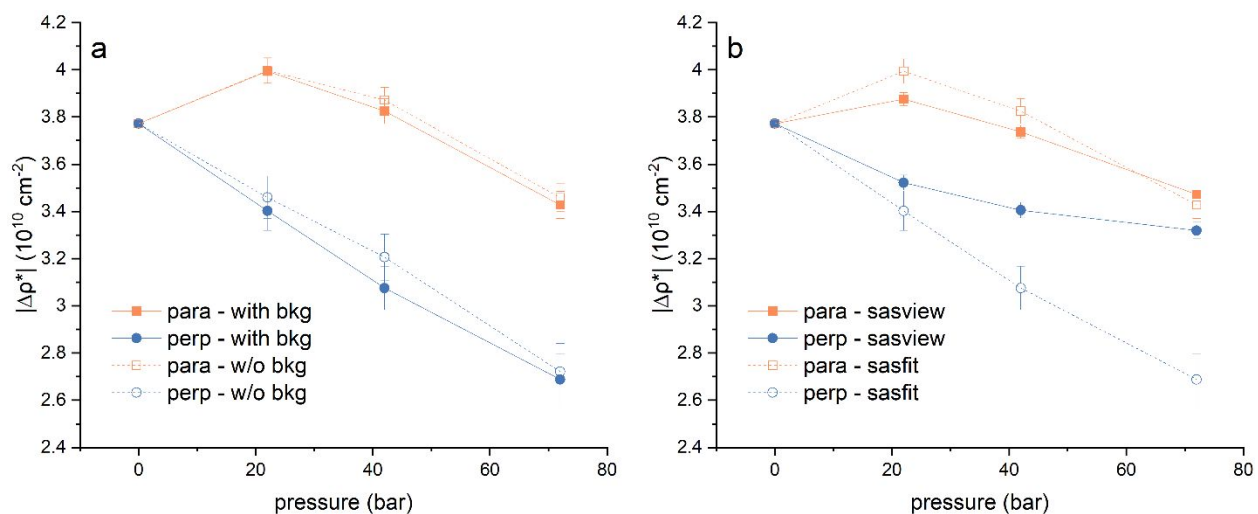

**Fig. S23** Scattering contrast as a function of pressure in mesopores during  $\text{CO}_2$  injection for the Hazleton coal thin section samples.

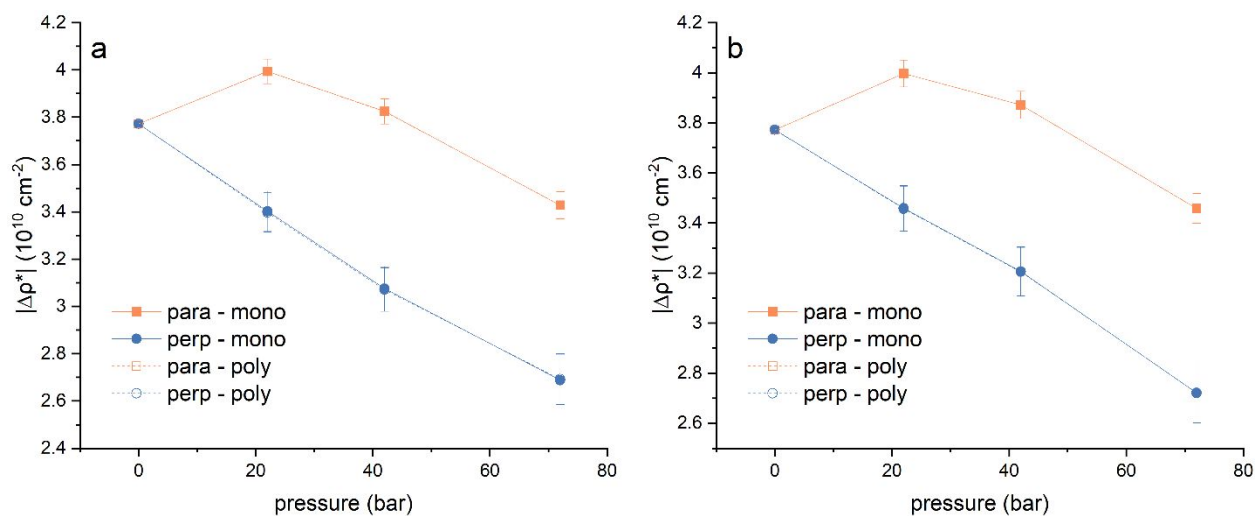

**Fig. S24** Scattering contrast as a function of pressure in mesopores during  $\text{CO}_2$  injection for the Hazleton coal thin section samples: (a) consider background; (b) without consider background.

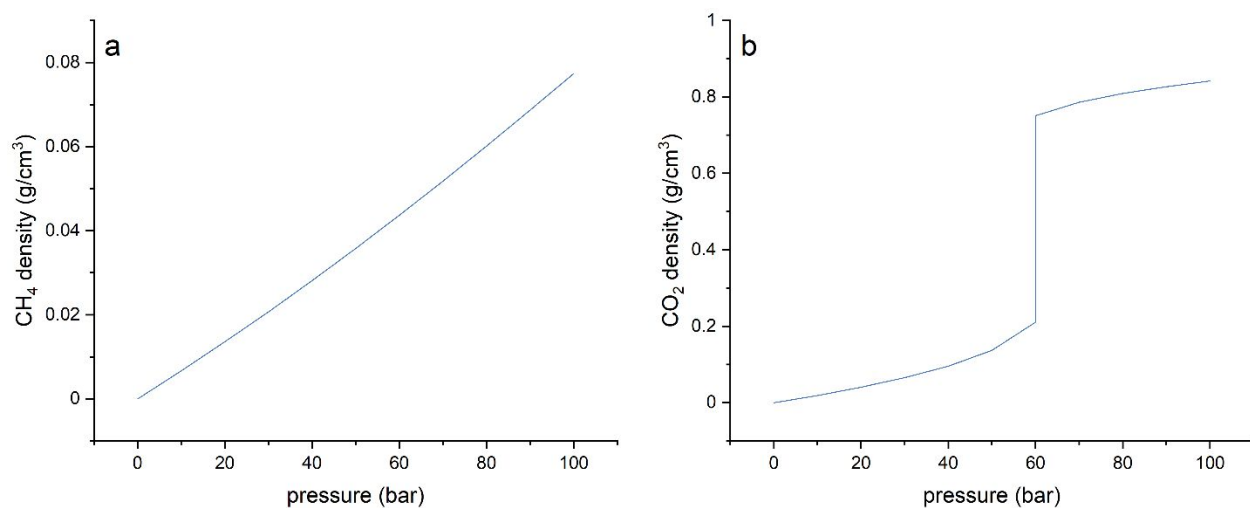

**Fig. S25** Bulk densities of (a)  $\text{CH}_4$  and (b)  $\text{CO}_2$  under room temperature.

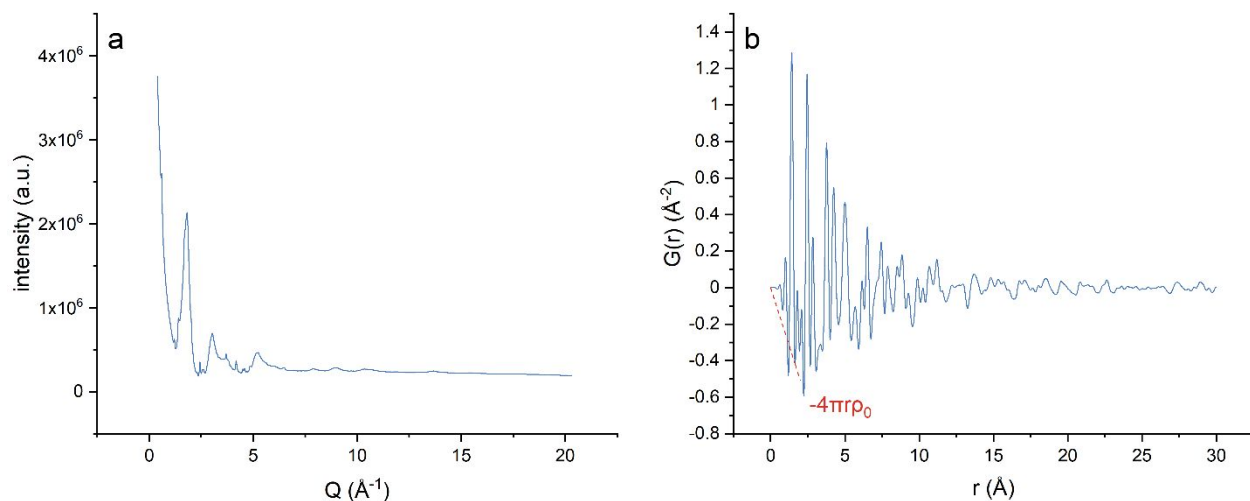

**Fig. S26** (a) The measured total scattering intensity without absolute intensity calibration and (b) the estimated atomic pair distribution function of the Hazleton coal.

## Tables

**Table S1** Ultimate analysis of the Hazleton coal

|              |           |
|--------------|-----------|
| Volatile     | 5.70 wt%  |
| Fixed carbon | 82.14 wt% |
| Ash          | 12.16 wt% |
| Sulfur       | 1.60 wt%  |
| Carbon       | 81.06 wt% |
| Hydrogen     | 1.81 wt%  |
| Nitrogen     | 0.90 wt%  |
| Oxygen       | 2.47 wt%  |

**Table S2** Data-fitting assuming monodisperse sphere in micropores for the Hazleton powder sample

| Package | Treatment | Micropore radius (Å) |
|---------|-----------|----------------------|
| sasfit  | with bkg  | 5.294±0.058          |
|         | w/o bkg   | 1.494±0.012          |
| sasview | with bkg  | 5.201±0.061          |
|         | w/o bkg   | 1.464±0.012          |

**Table S3** Data-fitting assuming polydisperse sphere in micropores for the Hazleton powder sample

| Package | Treatment | Micropore radius (Å) |
|---------|-----------|----------------------|
| sasfit  | with bkg  | 4.097±0.051          |
|         | w/o bkg   | 1.133±0.009          |
| sasview | with bkg  | 4.019±0.053          |
|         | w/o bkg   | 1.112±0.009          |

**Table S4** Data-fitting assuming monodisperse sphere in micropores for the Hazleton thin section sample cut parallel to the bedding

| Package | Treatment | Micropore radius (Å) | Mesopore radius (Å) |
|---------|-----------|----------------------|---------------------|
| sasfit  | with bkg  | 3.681±0.018          | 119.844±2.317       |
|         | w/o bkg   | 1.536±0.006          | 126.424±2.557       |
| sasview | with bkg  | 3.683±0.018          | 132.240±1.332       |
|         | w/o bkg   | 1.530±0.006          | 135.790±1.414       |

**Table S5** Data-fitting assuming polydisperse sphere in micropores for the Hazleton thin section sample cut parallel to the bedding

| Package | Treatment | Micropore radius (Å) | Mesopore radius (Å) |
|---------|-----------|----------------------|---------------------|
| sasfit  | with bkg  | 2.946±0.016          | 119.289±2.290       |
|         | w/o bkg   | 1.181±0.004          | 126.043±2.547       |
| sasview | with bkg  | 2.949±0.016          | 131.980±1.324       |
|         | w/o bkg   | 1.179±0.004          | 135.590±1.410       |

**Table S6** Data-fitting assuming monodisperse sphere in micropores for the Hazleton thin section sample cut perpendicular to the bedding

| Package | Treatment | Micropore radius (Å) | Mesopore radius (Å) |
|---------|-----------|----------------------|---------------------|
| sasfit  | with bkg  | 3.660±0.020          | 111.755±4.272       |
|         | w/o bkg   | 1.586±0.007          | 120.506±5.712       |
| sasview | with bkg  | 3.657±0.021          | 151.610±2.226       |
|         | w/o bkg   | 1.579±0.007          | 156.280±2.364       |



**Table S7** Data-fitting assuming polydisperse sphere in micropores for the Hazleton thin section sample cut perpendicular to the bedding

| Package | Treatment | Micropore radius (Å) | Mesopore radius (Å) |
|---------|-----------|----------------------|---------------------|
| sasfit  | with bkg  | 2.927±0.018          | 111.077±4.147       |
|         | w/o bkg   | 1.221±0.005          | 119.929±5.624       |
| sasview | with bkg  | 2.923±0.019          | 151.260±2.214       |
|         | w/o bkg   | 1.217±0.005          | 155.990±2.357       |
